# Supplementary material
Source: PubMed Central journal article supplement (PMC3551466)
Supplement: NIHMS393732-supplement-Appendix_C__Supplementary_Data.pdf [file NIHMS393732-supplement-Appendix_C__Supplementary_Data.pdf]

## Supplementary Tables

In the following supplementary tables we provide, for each comparison: (a) the distribution of the selected voxels in the brain according to the anatomical atlas described in (Hammers et al., 2003; Gousias et al., 2008); (b) the complete lists of SNPs with selection probability  $\geq 0.5$  for the sRRR rank 1, rank 2 and rank 3 analyses.

### AD versus CN

| # voxels | Region                                                                             |
|----------|------------------------------------------------------------------------------------|
| 3138     | Lateral ventricle, frontal horn, central part and occipital horn left              |
| 2986     | Lateral ventricle, frontal horn, central part and occipital horn right             |
| 937      | Hippocampus left                                                                   |
| 907      | Hippocampus right                                                                  |
| 580      | Posterior temporal lobe right                                                      |
| 402      | Posterior temporal lobe left                                                       |
| 289      | Lateral ventricle, temporal horn right                                             |
| 267      | Gyri parahippocampalis et ambiens left                                             |
| 211      | Amygdala left                                                                      |
| 206      | Lateral ventricle, temporal horn left                                              |
| 169      | Gyri parahippocampalis et ambiens right                                            |
| 156      | Caudate nucleus right                                                              |
| 133      | Amygdala right                                                                     |
| 101      | Lateral occipitotemporal gyrus, gyrus fusiformis right                             |
| 94       | Medial and inferior temporal gyri right                                            |
| 88       | Medial and inferior temporal gyri left                                             |
| 84       | Caudate nucleus left                                                               |
| 71       | Third ventricle                                                                    |
| 64       | Superior temporal gyrus, posterior part right                                      |
| 48       | Insula right                                                                       |
| 44       | Anterior temporal lobe, medial part left                                           |
| 35       | Superior temporal gyrus, posterior part left                                       |
| 32       | Precentral gyrus right                                                             |
| 27       | Corpus callosum                                                                    |
| 20       | Cingulate gyrus, posterior part right                                              |
| 18       | Inferior frontal gyrus right                                                       |
| 16       | Frontal lobe right, becomes middle frontal gyrus after subdivision of frontal lobe |
| 11       | Lateral orbital gyrus left                                                         |
| 9        | Lateral occipitotemporal gyrus, gyrus fusiformis left                              |
| 9        | Insula left                                                                        |

|   |                                              |
|---|----------------------------------------------|
| 9 | Parietal lobe left                           |
| 9 | Anterior temporal lobe, medial part right    |
| 9 | Superior parietal gyrus left                 |
| 6 | Occipital lobe right                         |
| 5 | Cingulate gyrus, anterior part left          |
| 5 | Superior frontal gyrus left                  |
| 5 | Postcentral gyrus right                      |
| 3 | Superior temporal gyrus, anterior part right |
| 2 | Thalamus left                                |
| 1 | Cingulate gyrus, posterior part left         |
| 1 | Thalamus right                               |
| 1 | Posterior orbital gyrus left                 |

Table 1: The distribution of the selected voxels in the brain, from the AD versus CN comparison. Among the 11394 selected voxels, 186 were labelled as background in the atlas used.

|               | SNP                | Gene      | Chr | MAF   | HWE   | $\hat{P}_{x_j}$ |
|---------------|--------------------|-----------|-----|-------|-------|-----------------|
| <b>Rank 1</b> | APOE- $\epsilon$ 4 | APOE      | 19  | 0.276 | 0.083 | 0.996           |
|               | rs2075650          | TOMM40    | 19  | 0.252 | 0.868 | 0.944           |
|               | rs3815501          | BZW1      | 2   | 0.154 | 0.470 | 0.758           |
|               | rs11132507         |           | 4   | 0.284 | 0.643 | 0.705           |
|               | rs11132508         |           | 4   | 0.284 | 0.643 | 0.705           |
|               | rs1681052          | LOC647946 | 18  | 0.077 | 0.647 | 0.681           |
|               | rs7761213          |           | 6   | 0.303 | 0.458 | 0.675           |
|               | rs17345545         |           | 1   | 0.266 | 0.422 | 0.647           |
|               | rs13340334         | PDZD2     | 5   | 0.112 | 0.336 | 0.611           |
|               | rs17103124         |           | 14  | 0.152 | 0.623 | 0.605           |
|               | rs8025706          |           | 15  | 0.309 | 0.040 | 0.597           |
|               | rs12185469         | YES1      | 18  | 0.118 | 1.000 | 0.572           |
|               | rs12185470         | YES1      | 18  | 0.118 | 1.000 | 0.572           |
|               | rs10766003         | TEAD1     | 11  | 0.130 | 1.000 | 0.559           |
|               | rs1503659          |           | 4   | 0.158 | 0.055 | 0.556           |
|               | rs913587           | KDM4C     | 9   | 0.439 | 0.524 | 0.550           |
|               | rs17380902         |           | 2   | 0.136 | 0.429 | 0.546           |
|               | rs17686103         |           | 5   | 0.303 | 0.181 | 0.546           |
|               | rs785232           |           | 2   | 0.301 | 0.456 | 0.538           |
|               | rs4771473          |           | 13  | 0.221 | 0.027 | 0.530           |
|               | rs11740943         |           | 5   | 0.173 | 1.000 | 0.524           |

|               |            |          |    |       |       |       |
|---------------|------------|----------|----|-------|-------|-------|
|               | rs7536709  |          | 1  | 0.280 | 0.642 | 0.524 |
|               | rs17516202 | YES1     | 18 | 0.120 | 1.000 | 0.524 |
|               | rs157580   | TOMM40   | 19 | 0.319 | 1.000 | 0.514 |
|               | rs1750304  | MEF2D    | 1  | 0.122 | 0.019 | 0.506 |
|               | rs1171560  | MEF2D    | 1  | 0.122 | 0.019 | 0.506 |
| <b>Rank 2</b> | rs9263844  |          | 6  | 0.161 | 1.000 | 0.772 |
|               | rs9263846  |          | 6  | 0.161 | 1.000 | 0.772 |
|               | rs7999394  | MTRF1    | 13 | 0.408 | 0.027 | 0.746 |
|               | rs3794328  | MTRF1    | 13 | 0.408 | 0.027 | 0.746 |
|               | rs11590365 |          | 1  | 0.114 | 0.547 | 0.621 |
|               | rs11204949 |          | 1  | 0.114 | 0.547 | 0.621 |
|               | rs11204971 |          | 1  | 0.114 | 0.547 | 0.621 |
|               | rs12405278 | FLG      | 1  | 0.114 | 0.547 | 0.621 |
|               | rs215340   |          | 12 | 0.248 | 1.000 | 0.593 |
|               | rs7603289  |          | 2  | 0.345 | 0.330 | 0.585 |
|               | rs11144246 | OSTF1    | 9  | 0.118 | 0.762 | 0.585 |
|               | rs6910087  |          | 6  | 0.132 | 0.167 | 0.568 |
|               | rs4685279  |          | 3  | 0.291 | 0.174 | 0.562 |
|               | rs3824139  | ARHGEF10 | 8  | 0.167 | 0.001 | 0.556 |
|               | rs6932730  |          | 6  | 0.211 | 0.344 | 0.554 |
|               | rs1750304  | MEF2D    | 1  | 0.122 | 0.019 | 0.548 |
|               | rs1171560  | MEF2D    | 1  | 0.122 | 0.019 | 0.548 |
|               | rs9263969  |          | 6  | 0.236 | 1.000 | 0.542 |
|               | rs6700106  |          | 1  | 0.179 | 0.283 | 0.536 |
|               | rs795342   |          | 12 | 0.201 | 0.119 | 0.536 |
|               | rs10026499 |          | 4  | 0.325 | 0.015 | 0.534 |
|               | rs7979925  |          | 12 | 0.370 | 0.788 | 0.530 |
|               | rs2325     |          | 10 | 0.152 | 0.325 | 0.526 |
|               | rs7944761  |          | 11 | 0.490 | 0.453 | 0.522 |
|               | rs12178606 |          | 6  | 0.106 | 0.176 | 0.518 |
|               | rs215347   |          | 12 | 0.264 | 0.873 | 0.518 |
|               | rs2268939  | USP13    | 3  | 0.301 | 0.018 | 0.516 |
|               | rs6429696  | KAZ      | 1  | 0.449 | 0.703 | 0.514 |
|               | rs11215380 |          | 11 | 0.260 | 1.000 | 0.508 |
| <b>Rank 3</b> | rs727432   | ADCY2    | 5  | 0.282 | 0.877 | 0.709 |
|               | rs11783329 |          | 8  | 0.398 | 0.435 | 0.589 |
|               | rs7114756  | MAML2    | 11 | 0.161 | 0.059 | 0.581 |
|               | rs17309585 |          | 8  | 0.406 | 1.000 | 0.526 |

|  |            |       |   |       |       |       |
|--|------------|-------|---|-------|-------|-------|
|  | rs10491327 |       | 5 | 0.183 | 0.143 | 0.520 |
|  | rs12534148 | PDE1C | 7 | 0.270 | 0.153 | 0.506 |

Table 2: SNPs with maximum selection probabilities  $\geq 0.5$  (ranked according to their selection probabilities) for rank 1, 2 and 3 of the AC versus CN sRRR analysis. For each marker also provided are: the corresponding gene annotation, where applicable, the chromosome, the MAF, the HWE  $p$ -value and the selection probability.

### P-MCI versus CN

| # voxels | Region                                                                             |
|----------|------------------------------------------------------------------------------------|
| 2201     | Lateral ventricle, frontal horn, central part and occipital horn left              |
| 1781     | Lateral ventricle, frontal horn, central part and occipital horn right             |
| 790      | Hippocampus left                                                                   |
| 716      | Hippocampus right                                                                  |
| 686      | Posterior temporal lobe left                                                       |
| 599      | Superior parietal gyrus right                                                      |
| 574      | Posterior temporal lobe right                                                      |
| 416      | Amygdala left                                                                      |
| 412      | Gyri parahippocampalis et ambiens left                                             |
| 403      | Medial and inferior temporal gyri right                                            |
| 286      | Lateral ventricle, temporal horn right                                             |
| 280      | Amygdala right                                                                     |
| 256      | Superior parietal gyrus left                                                       |
| 249      | Medial and inferior temporal gyri left                                             |
| 220      | Lateral ventricle, temporal horn left                                              |
| 182      | Caudate nucleus right                                                              |
| 171      | Lateral occipitotemporal gyrus, gyrus fusiformis left                              |
| 165      | Lateral occipitotemporal gyrus, gyrus fusiformis right                             |
| 160      | Caudate nucleus left                                                               |
| 157      | Superior temporal gyrus, posterior part left                                       |
| 152      | Gyri parahippocampalis et ambiens right                                            |
| 148      | Insula left                                                                        |
| 146      | Superior temporal gyrus, posterior part right                                      |
| 145      | Parietal lobe left                                                                 |
| 99       | Insula right                                                                       |
| 91       | Anterior temporal lobe, medial part left                                           |
| 89       | Frontal lobe right, becomes middle frontal gyrus after subdivision of frontal lobe |
| 73       | Parietal lobe right                                                                |

|    |                                                                                   |
|----|-----------------------------------------------------------------------------------|
| 69 | Anterior temporal lobe, medial part right                                         |
| 56 | Anterior temporal lobe, lateral part right                                        |
| 47 | Occipital lobe right                                                              |
| 39 | Precentral gyrus right                                                            |
| 33 | Frontal lobe left, becomes middle frontal gyrus after subdivision of frontal lobe |
| 32 | Corpus callosum                                                                   |
| 31 | Cingulate gyrus, posterior part left                                              |
| 30 | Cuneus right                                                                      |
| 26 | Third ventricle                                                                   |
| 23 | Superior temporal gyrus, anterior part right                                      |
| 21 | Inferior frontal gyrus right                                                      |
| 11 | Lingual gyrus right                                                               |
| 10 | Occipital lobe left                                                               |
| 10 | Lateral orbital gyrus left                                                        |
| 9  | Superior frontal gyrus right                                                      |
| 7  | Superior frontal gyrus left                                                       |
| 7  | Postcentral gyrus right                                                           |
| 6  | Postcentral gyrus left                                                            |
| 6  | Lingual gyrus left                                                                |
| 5  | Cerebellum left                                                                   |
| 5  | Posterior orbital gyrus left                                                      |
| 3  | Brainstem, spans the midline                                                      |
| 3  | Thalamus left                                                                     |
| 3  | Inferior frontal gyrus left                                                       |
| 3  | Subgenual frontal cortex left                                                     |
| 2  | Cuneus left                                                                       |
| 2  | Superior temporal gyrus, anterior part left                                       |
| 1  | Cingulate gyrus, posterior part right                                             |
| 1  | Anterior orbital gyrus left                                                       |
| 1  | Medial orbital gyrus left                                                         |

Table 3: The distribution of the selected voxels in the brain, from the P-MCI versus CN comparison. Among the 12664 selected voxels, 515 were labelled as background in the atlas used.

|               | SNP                | Gene  | Chr | MAF   | HWE   | $\hat{P}_{x_j}$ |
|---------------|--------------------|-------|-----|-------|-------|-----------------|
| <b>Rank 1</b> | APOE- $\epsilon$ 4 | APOE  | 19  | 0.271 | 0.083 | 0.982           |
|               | rs2883782          | MYO3B | 2   | 0.483 | 0.387 | 0.746           |
|               | rs2798062          |       | 9   | 0.256 | 0.105 | 0.712           |

|               |            |         |    |       |       |       |
|---------------|------------|---------|----|-------|-------|-------|
|               | rs10934170 |         | 3  | 0.146 | 0.619 | 0.681 |
|               | rs17826780 |         | 4  | 0.102 | 0.318 | 0.665 |
|               | rs7843577  |         | 8  | 0.448 | 1.000 | 0.617 |
|               | rs2075650  | TOMM40  | 19 | 0.246 | 0.180 | 0.589 |
|               | rs1405443  |         | 7  | 0.135 | 1.000 | 0.583 |
|               | rs758491   | RBFOX1  | 16 | 0.352 | 1.000 | 0.566 |
|               | rs914166   |         | 21 | 0.150 | 0.624 | 0.548 |
|               | rs11150643 |         | 16 | 0.300 | 0.883 | 0.542 |
|               | rs1981664  | COX7A2L | 2  | 0.417 | 0.446 | 0.534 |
|               | rs10206058 | COX7A2L | 2  | 0.356 | 0.499 | 0.528 |
|               | rs717963   | PAPPA   | 9  | 0.360 | 0.894 | 0.522 |
|               | rs10509839 |         | 10 | 0.252 | 0.412 | 0.522 |
|               | rs763732   | RGS6    | 14 | 0.208 | 0.457 | 0.520 |
|               | rs6884345  |         | 5  | 0.229 | 0.862 | 0.512 |
|               | rs11242336 |         | 5  | 0.229 | 0.862 | 0.512 |
|               | rs10994250 | ANK3    | 10 | 0.196 | 0.556 | 0.512 |
|               | rs10821707 | ANK3    | 10 | 0.194 | 0.325 | 0.512 |
|               | rs3912887  |         | 4  | 0.396 | 0.897 | 0.510 |
|               | rs419867   |         | 21 | 0.333 | 0.890 | 0.504 |
|               | rs2837900  |         | 21 | 0.139 | 0.296 | 0.500 |
|               | rs2837902  |         | 21 | 0.139 | 0.296 | 0.500 |
| <b>Rank 2</b> | rs13132552 | SORBS2  | 4  | 0.348 | 1.000 | 0.792 |
|               | rs12633719 |         | 3  | 0.233 | 0.490 | 0.671 |
|               | rs11069874 |         | 13 | 0.158 | 0.242 | 0.661 |
|               | rs885339   |         | 13 | 0.158 | 0.242 | 0.661 |
|               | rs2381958  |         | 5  | 0.204 | 0.343 | 0.655 |
|               | rs10041184 |         | 5  | 0.217 | 0.146 | 0.639 |
|               | rs4265409  |         | 1  | 0.440 | 0.706 | 0.627 |
|               | rs7584948  | ANTXR1  | 2  | 0.187 | 0.105 | 0.623 |
|               | rs501435   | ODZ4    | 11 | 0.150 | 0.811 | 0.599 |
|               | rs1001684  |         | 5  | 0.265 | 0.874 | 0.595 |
|               | rs1257687  |         | 14 | 0.189 | 0.541 | 0.575 |
|               | rs7336788  |         | 13 | 0.181 | 0.295 | 0.571 |
|               | rs10065570 | RPL37   | 5  | 0.283 | 0.540 | 0.560 |
|               | rs6783007  |         | 3  | 0.400 | 0.605 | 0.558 |
|               | rs10070362 |         | 5  | 0.108 | 0.749 | 0.550 |
|               | rs9522086  |         | 13 | 0.140 | 0.308 | 0.550 |
|               | rs11946115 |         | 4  | 0.200 | 0.700 | 0.542 |
|               | rs7734346  |         | 5  | 0.112 | 1.000 | 0.542 |

|               |            |          |    |       |       |       |
|---------------|------------|----------|----|-------|-------|-------|
|               | rs10155062 |          | 4  | 0.342 | 0.131 | 0.540 |
|               | rs1289501  |          | 11 | 0.294 | 0.370 | 0.534 |
|               | rs11949577 | PLEKHG4B | 5  | 0.110 | 0.750 | 0.528 |
|               | rs13436090 | PLEKHG4B | 5  | 0.110 | 0.750 | 0.528 |
|               | rs17370295 |          | 3  | 0.127 | 0.271 | 0.520 |
|               | rs3760961  | TLE2     | 19 | 0.298 | 0.768 | 0.516 |
|               | rs2965069  |          | 7  | 0.379 | 0.895 | 0.512 |
|               | rs478090   | ODZ4     | 11 | 0.125 | 0.777 | 0.510 |
|               | rs2965245  | ZNF677   | 19 | 0.312 | 0.885 | 0.504 |
|               | rs962492   |          | 5  | 0.229 | 0.022 | 0.504 |
|               | rs7963861  | C12orf63 | 12 | 0.412 | 0.159 | 0.500 |
| <b>Rank 3</b> | rs705837   | PRSS12   | 4  | 0.375 | 0.895 | 0.639 |
|               | rs11856999 | MAP2K5   | 15 | 0.148 | 0.227 | 0.605 |
|               | rs7653663  | MGLL     | 3  | 0.165 | 0.111 | 0.601 |
|               | rs12597064 |          | 16 | 0.240 | 1.000 | 0.570 |
|               | rs633398   | NDST3    | 4  | 0.373 | 0.895 | 0.546 |
|               | rs631271   | NDST3    | 4  | 0.371 | 1.000 | 0.544 |
|               | rs1529442  | AQPEP    | 5  | 0.323 | 0.201 | 0.542 |
|               | rs6864491  | AQPEP    | 5  | 0.450 | 0.802 | 0.534 |
|               | rs10445932 | NRXN1    | 2  | 0.106 | 0.750 | 0.518 |
|               | rs885120   | AQPEP    | 5  | 0.489 | 0.621 | 0.512 |
|               | rs12236788 |          | 9  | 0.187 | 0.540 | 0.510 |

Table 4: SNPs with maximum selection probabilities  $\geq 0.5$  (ranked according to their selection probabilities) for rank 1, 2 and 3 of the P-MCI versus CN sRRR analysis. For each marker also provided are: the corresponding gene annotation, where applicable, the chromosome, the MAF, the HWE  $p$ -value and the selection probability.

### P-MCI versus S-MCI

| # voxels | Region                                                                             |
|----------|------------------------------------------------------------------------------------|
| 1062     | Lateral ventricle, frontal horn, central part and occipital horn left              |
| 795      | Posterior temporal lobe left                                                       |
| 742      | Lateral ventricle, frontal horn, central part and occipital horn right             |
| 695      | Superior parietal gyrus right                                                      |
| 558      | Posterior temporal lobe right                                                      |
| 455      | Hippocampus left                                                                   |
| 428      | Hippocampus right                                                                  |
| 339      | Frontal lobe right, becomes middle frontal gyrus after subdivision of frontal lobe |

|     |                                                                                   |
|-----|-----------------------------------------------------------------------------------|
| 299 | Medial and inferior temporal gyri right                                           |
| 298 | Superior temporal gyrus, posterior part right                                     |
| 288 | Frontal lobe left, becomes middle frontal gyrus after subdivision of frontal lobe |
| 231 | Lateral ventricle, temporal horn right                                            |
| 228 | Parietal lobe left                                                                |
| 208 | Insula right                                                                      |
| 208 | Superior parietal gyrus left                                                      |
| 188 | Medial and inferior temporal gyri left                                            |
| 166 | Lateral ventricle, temporal horn left                                             |
| 157 | Amygdala left                                                                     |
| 148 | Gyri parahippocampalis et ambiens left                                            |
| 143 | Occipital lobe right                                                              |
| 139 | Superior frontal gyrus left                                                       |
| 128 | Corpus callosum                                                                   |
| 125 | Parietal lobe right                                                               |
| 119 | Insula left                                                                       |
| 114 | Superior frontal gyrus right                                                      |
| 112 | Cerebellum left                                                                   |
| 94  | Superior temporal gyrus, posterior part left                                      |
| 92  | Amygdala right                                                                    |
| 84  | Gyri parahippocampalis et ambiens right                                           |
| 80  | Lingual gyrus right                                                               |
| 76  | Caudate nucleus left                                                              |
| 76  | Anterior temporal lobe, medial part left                                          |
| 72  | Precentral gyrus left                                                             |
| 67  | Cerebellum right                                                                  |
| 57  | Lateral occipitotemporal gyrus, gyrus fusiformis right                            |
| 54  | Lateral occipitotemporal gyrus, gyrus fusiformis left                             |
| 52  | Anterior temporal lobe, medial part right                                         |
| 50  | Brainstem, spans the midline                                                      |
| 49  | Caudate nucleus right                                                             |
| 45  | Putamen right                                                                     |
| 45  | Postcentral gyrus right                                                           |
| 42  | Lingual gyrus left                                                                |
| 39  | Cingulate gyrus, posterior part right                                             |
| 38  | Precentral gyrus right                                                            |
| 36  | Postcentral gyrus left                                                            |
| 35  | Inferior frontal gyrus right                                                      |
| 35  | Medial orbital gyrus right                                                        |



|    |                                              |
|----|----------------------------------------------|
| 33 | Anterior temporal lobe, lateral part right   |
| 31 | Cuneus right                                 |
| 30 | Cingulate gyrus, anterior part right         |
| 26 | Lateral orbital gyrus right                  |
| 25 | Lateral orbital gyrus left                   |
| 24 | Inferior frontal gyrus left                  |
| 21 | Superior temporal gyrus, anterior part right |
| 20 | Thalamus right                               |
| 20 | Third ventricle                              |
| 18 | Occipital lobe left                          |
| 17 | Cingulate gyrus, posterior part left         |
| 17 | Straight gyrus, gyrus rectus left            |
| 16 | Cingulate gyrus, anterior part left          |
| 16 | Cuneus left                                  |
| 14 | Posterior orbital gyrus right                |
| 12 | Superior temporal gyrus, anterior part left  |
| 11 | Thalamus left                                |
| 10 | Straight gyrus, gyrus rectus right           |
| 7  | Subgenual frontal cortex left                |
| 4  | Anterior temporal lobe, lateral part left    |
| 4  | Pre-subgenual frontal cortex left            |
| 1  | Anterior orbital gyrus left                  |
| 1  | Subcallosal area right                       |
| 1  | Pre-subgenual frontal cortex right           |

Table 5: The distribution of the selected voxels in the brain, from the P-MCI versus S-MCI comparison. Among the 10593 selected voxels, 623 were labelled as background in the atlas used.

|               | SNP                | Gene | Chr | MAF   | HWE   | $\hat{P}_{x_j}$ |
|---------------|--------------------|------|-----|-------|-------|-----------------|
| <b>Rank 1</b> | APOE- $\epsilon$ 4 | APOE | 19  | 0.346 | 0.300 | 0.903           |
|               | rs2038358          |      | 14  | 0.240 | 0.459 | 0.774           |
|               | rs2615945          |      | 11  | 0.405 | 0.889 | 0.685           |
|               | rs2602629          |      | 2   | 0.498 | 0.005 | 0.683           |
|               | rs9633774          |      | 10  | 0.423 | 0.217 | 0.653           |
|               | rs12356435         |      | 10  | 0.312 | 0.876 | 0.641           |
|               | rs11256463         |      | 10  | 0.405 | 0.328 | 0.623           |
|               | rs7068256          | MGMT | 10  | 0.240 | 0.063 | 0.607           |
|               | rs8014021          |      | 14  | 0.158 | 0.801 | 0.599           |

|               |            |         |    |       |       |       |
|---------------|------------|---------|----|-------|-------|-------|
|               | rs965566   |         | 5  | 0.319 | 0.644 | 0.588 |
|               | rs10861171 | TXNRD1  | 12 | 0.122 | 1.000 | 0.587 |
|               | rs4899126  |         | 14 | 0.156 | 1.000 | 0.580 |
|               | rs10511576 |         | 9  | 0.206 | 0.837 | 0.571 |
|               | rs4547037  | GRID1   | 10 | 0.285 | 0.188 | 0.564 |
|               | rs8090480  | MBD2    | 18 | 0.407 | 0.213 | 0.556 |
|               | rs8094493  | MBD2    | 18 | 0.410 | 0.210 | 0.544 |
|               | rs10780472 |         | 9  | 0.337 | 1.000 | 0.536 |
|               | rs715976   |         | 9  | 0.337 | 1.000 | 0.536 |
|               | rs2580062  |         | 4  | 0.373 | 0.668 | 0.532 |
|               | rs6799133  | FNDC3B  | 3  | 0.421 | 0.490 | 0.530 |
|               | rs6589963  |         | 11 | 0.378 | 0.390 | 0.530 |
|               | rs1249794  | SLC44A5 | 1  | 0.328 | 0.022 | 0.528 |
|               | rs2972005  | SLC44A5 | 1  | 0.328 | 0.022 | 0.528 |
|               | rs1778459  | SLC44A5 | 1  | 0.328 | 0.022 | 0.528 |
|               | rs12402118 | SLC44A5 | 1  | 0.328 | 0.022 | 0.528 |
|               | rs6795768  | FNDC3B  | 3  | 0.450 | 0.277 | 0.522 |
|               | rs4586843  | FNDC3B  | 3  | 0.450 | 0.277 | 0.522 |
|               | rs6803988  | ALS2CL  | 3  | 0.294 | 0.108 | 0.522 |
|               | rs2195894  |         | 7  | 0.315 | 0.641 | 0.518 |
|               | rs10261329 |         | 7  | 0.315 | 0.641 | 0.518 |
|               | rs10905653 |         | 10 | 0.346 | 0.300 | 0.518 |
|               | rs6463119  |         | 7  | 0.448 | 0.587 | 0.516 |
|               | rs1991769  |         | 7  | 0.353 | 1.000 | 0.516 |
|               | rs1423626  |         | 5  | 0.333 | 0.650 | 0.512 |
|               | rs6687745  |         | 1  | 0.477 | 0.893 | 0.506 |
|               | rs6363     |         | 16 | 0.231 | 0.128 | 0.506 |
|               | rs11150643 |         | 16 | 0.292 | 0.515 | 0.502 |
| <b>Rank 2</b> | rs12420917 |         | 11 | 0.401 | 0.576 | 0.573 |
| <b>Rank 3</b> | rs10751709 |         | 12 | 0.292 | 0.418 | 0.754 |
|               | rs2703862  |         | 8  | 0.104 | 0.067 | 0.617 |
|               | rs2507717  |         | 8  | 0.106 | 0.079 | 0.597 |
|               | rs9295895  |         | 6  | 0.247 | 0.366 | 0.581 |
|               | rs10082970 |         | 12 | 0.215 | 0.432 | 0.548 |
|               | rs10503991 |         | 8  | 0.111 | 0.158 | 0.512 |
|               | rs6468370  |         | 8  | 0.111 | 0.158 | 0.512 |

---

Table 6: SNPs with maximum selection probabilities  $\geq 0.5$  (ranked according to their selection probabilities) for rank 1, 2 and 3 of the P-MCI versus S-MCI sRRR analysis. For each marker also provided are: the corresponding gene annotation, where applicable, the chromosome, the MAF, the HWE  $p$ -value and the selection probability.

## References

- Gousias, I., Rueckert, D., Heckemann, R., Dyet, L., Boardman, J., Edwards, A., and Hammers, A. (2008). Automatic segmentation of brain MRIs of 2-year-olds into 83 regions of interest. *NeuroImage*, 40(2):672–684.
- Hammers, A., Allom, R., Koepp, M., Free, S., Myers, R., Lemieux, L., Mitchell, T., Brooks, D., and Duncan, J. (2003). Three-dimensional maximum probability atlas of the human brain, with particular reference to the temporal lobe. *Human brain mapping*, 19(4):224–247.
